# Supplementary material for: Detailed insight into the dynamics of the initial phases of de novo RNA-directed DNA methylation in plant cells
Source: PubMed Central journal article supplement (PMC6737654; doi:10.1186/s13072-019-0299-0), 2019-09-11
Supplement: 13072_2019_299_MOESM1_ESM.pdf [file 13072_2019_299_MOESM1_ESM.pdf]

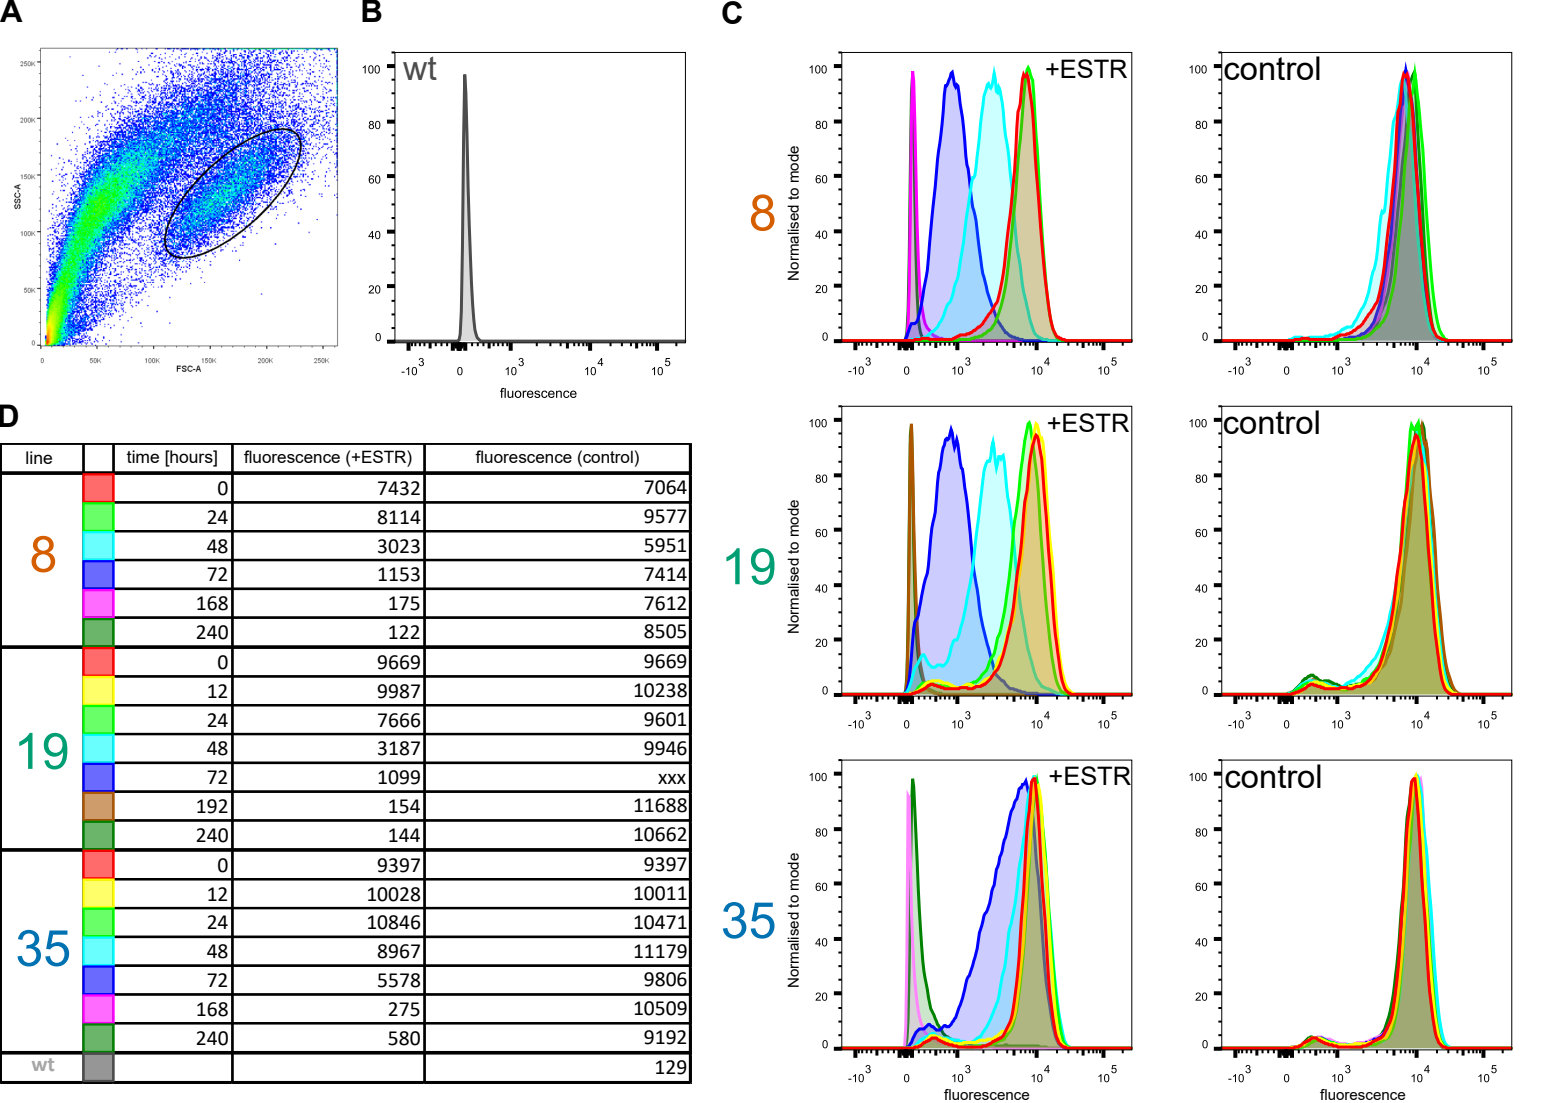

### Additional file 1 Analysis of GFP fluorescence in BY-2 protoplasts.

Changes in GFP fluorescence in protoplasts isolated from BY-2 suspension cultures were monitored by flow cytometry: (A) a selection of living protoplasts was based on the forward and side scatter signals; Flow-cytometry histograms show distribution of fluorescence intensity in (B) wt BY-2 cells and (C) analysed transgenic lines (8, 19 and 35) before and during the treatment with  $\beta$ -estradiol (+ESTR) or DMSO (control); (D) the colour code for the histograms and the table of mean GFP fluorescence intensities during the treatment.
