# Supplementary material for: Detailed insight into the dynamics of the initial phases of de novo RNA-directed DNA methylation in plant cells
Source: PubMed Central journal article supplement (PMC6737654; doi:10.1186/s13072-019-0299-0), 2019-09-11
Supplement: 13072_2019_299_MOESM2_ESM.pdf [file 13072_2019_299_MOESM2_ESM.pdf]

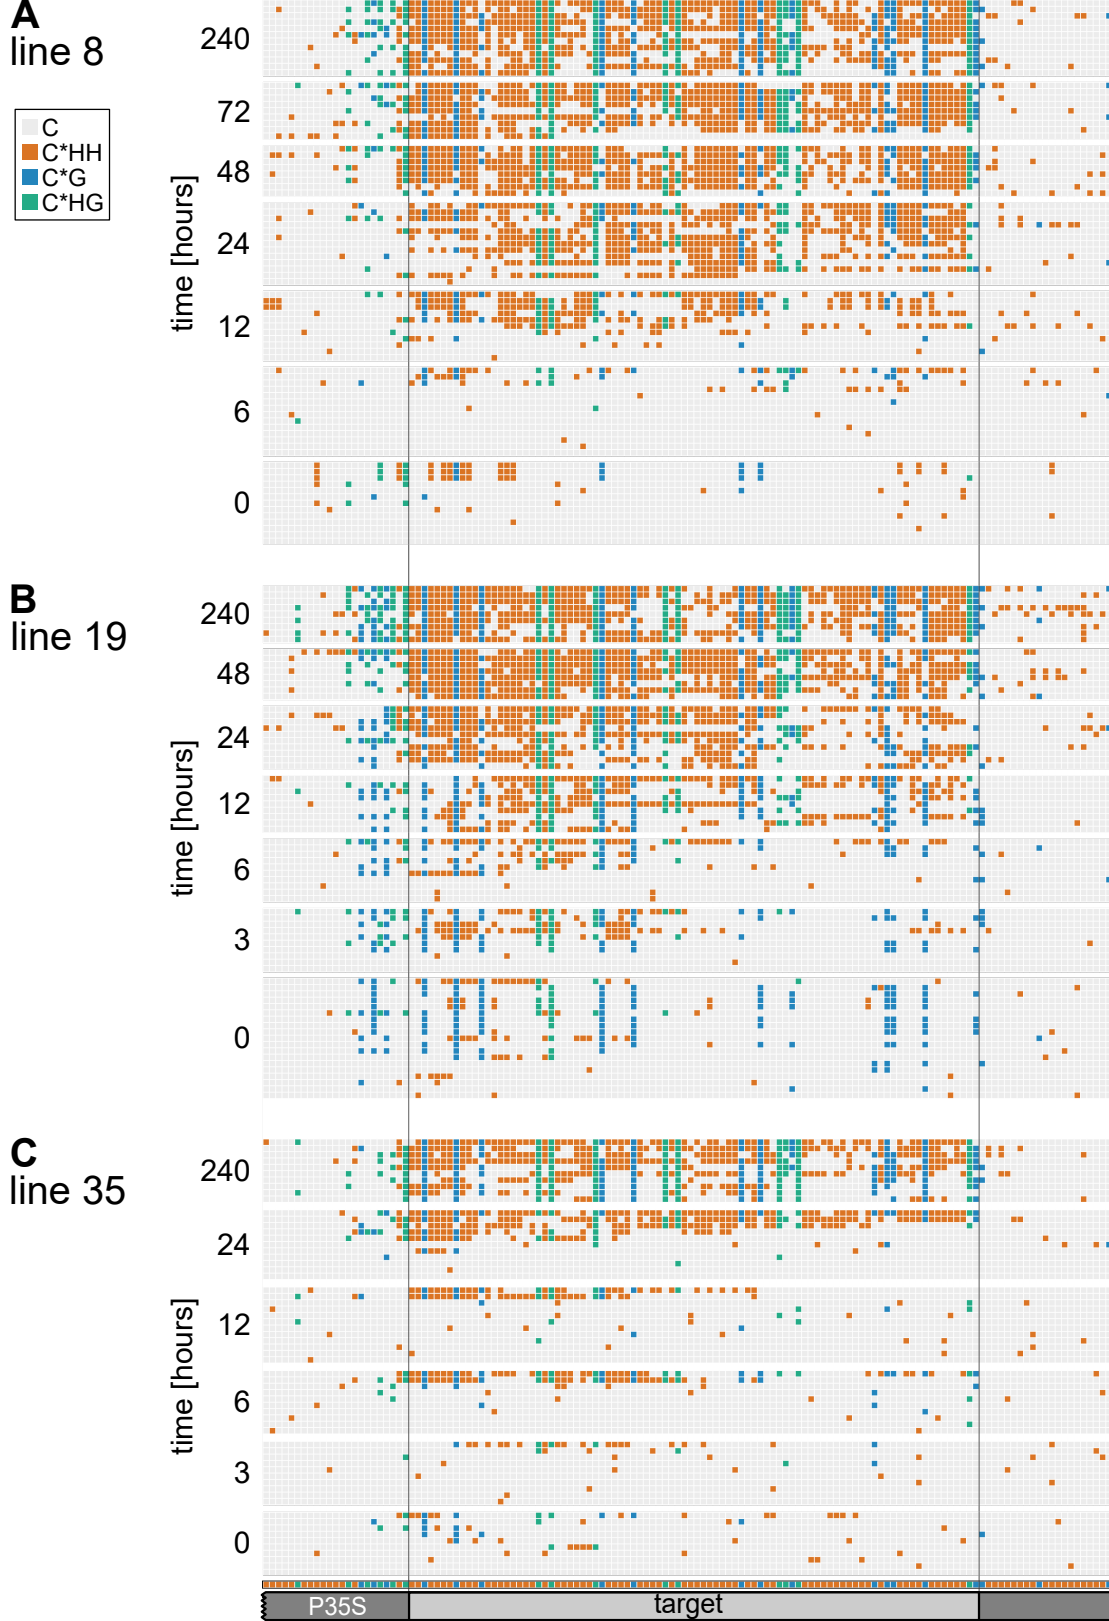

**Additional file 2 Distribution of methylated cytosines in the P35S region.**

Dot plot overview of the fate of all analysed cytosines in each individually sequenced read during the  $\beta$ -estradiol treatment of the three analysed lines. Colour-coded spots depict the position of methylated cytosines in various sequence contexts. The lowest line indicates cytosine sequence contexts in the individual positions.
