# Supplementary material for: Detailed insight into the dynamics of the initial phases of de novo RNA-directed DNA methylation in plant cells
Source: PubMed Central journal article supplement (PMC6737654; doi:10.1186/s13072-019-0299-0), 2019-09-11
Supplement: 13072_2019_299_MOESM3_ESM.pdf [file 13072_2019_299_MOESM3_ESM.pdf]

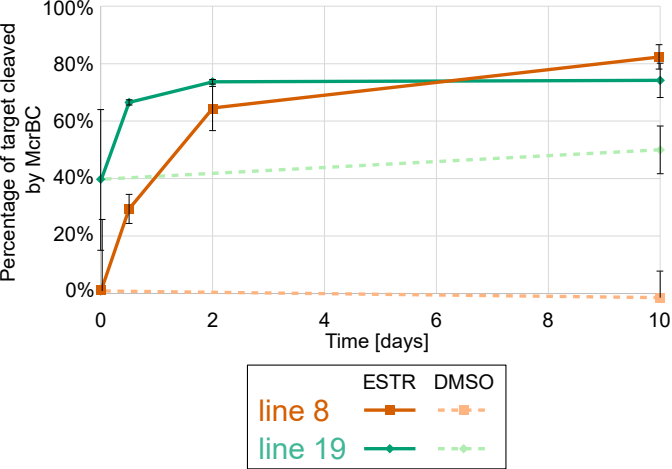

### **Additional file 3 Estimation of the P35S methylation by McrBC cleavage.**

The plot indicates the proportion of methylated DNA at selected time points, as determined by qPCR of the P35S region after treatment with methyl-specific activity of McrBC.
