# Supplementary material for: Detailed insight into the dynamics of the initial phases of de novo RNA-directed DNA methylation in plant cells
Source: PubMed Central journal article supplement (PMC6737654; doi:10.1186/s13072-019-0299-0), 2019-09-11
Supplement: 13072_2019_299_MOESM4_ESM.pdf [file 13072_2019_299_MOESM4_ESM.pdf]

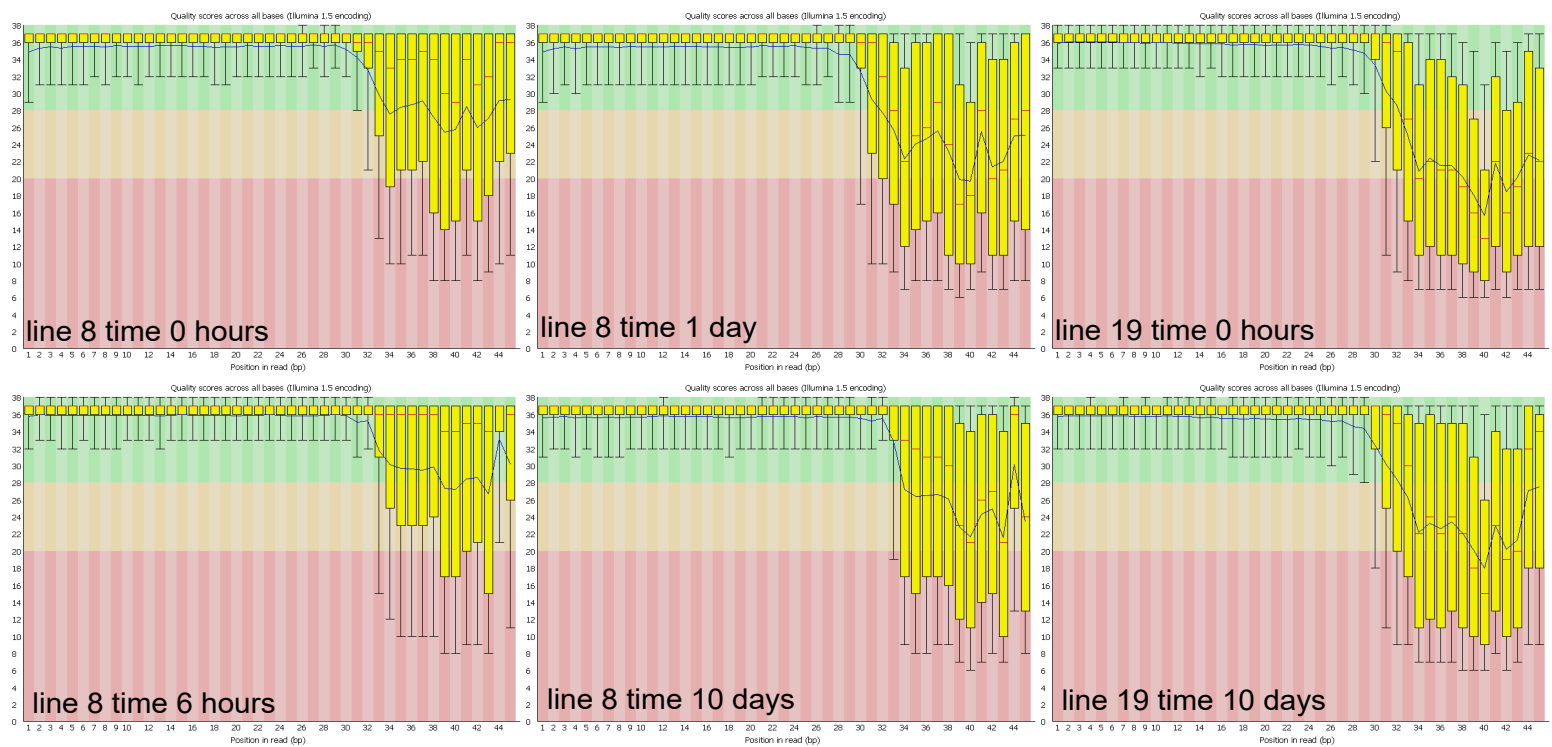

## Additional file 4 Quality scores for sRNA sequencing.

The plots of “Illumina 1.5 encoding” quality scores clearly show high reliability of sequencing of sRNAs up to the length of about 30nt.
