# Supplementary material for: Detailed insight into the dynamics of the initial phases of de novo RNA-directed DNA methylation in plant cells
Source: PubMed Central journal article supplement (PMC6737654; doi:10.1186/s13072-019-0299-0), 2019-09-11
Supplement: 13072_2019_299_MOESM5_ESM.pdf [file 13072_2019_299_MOESM5_ESM.pdf]

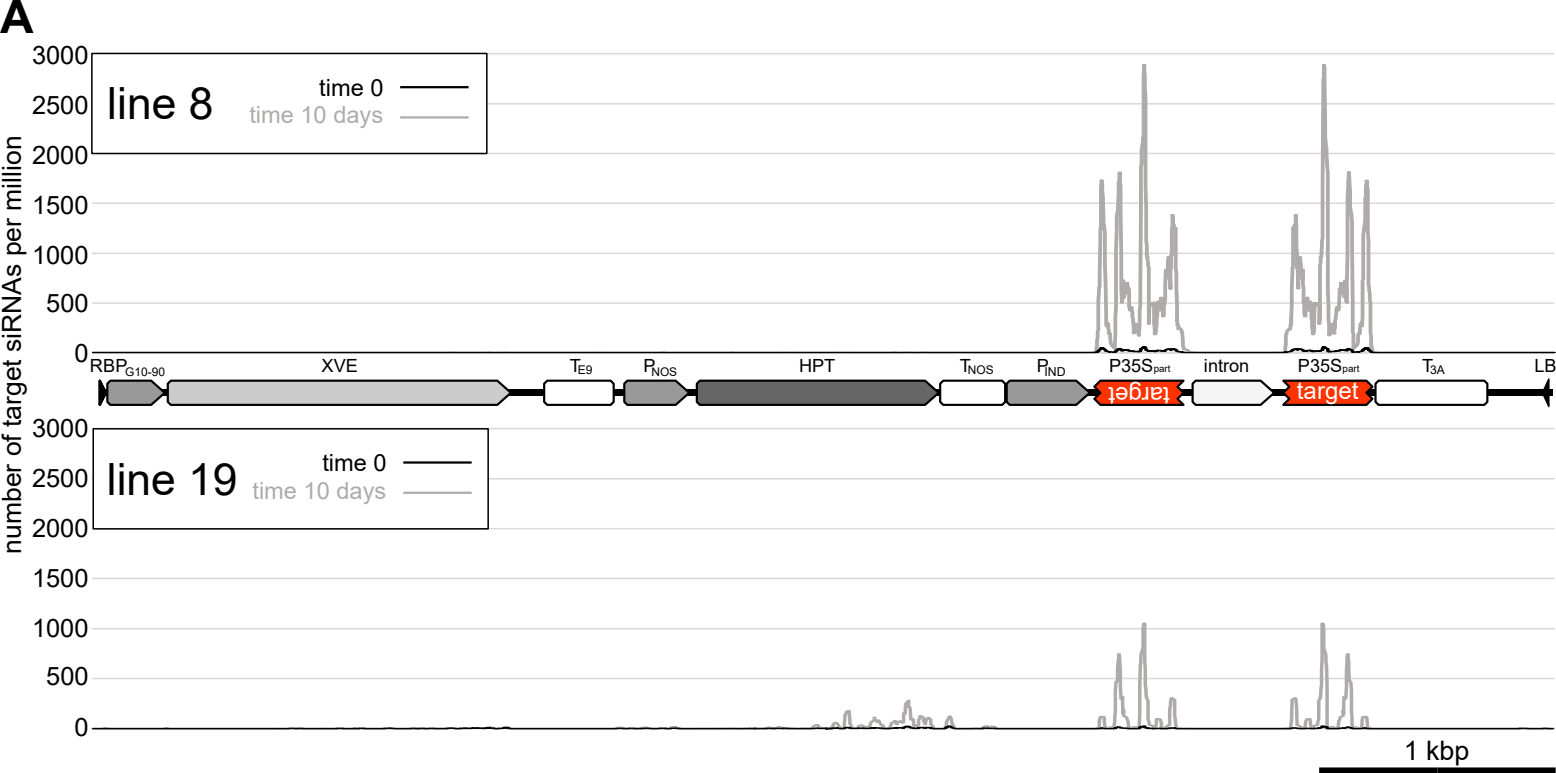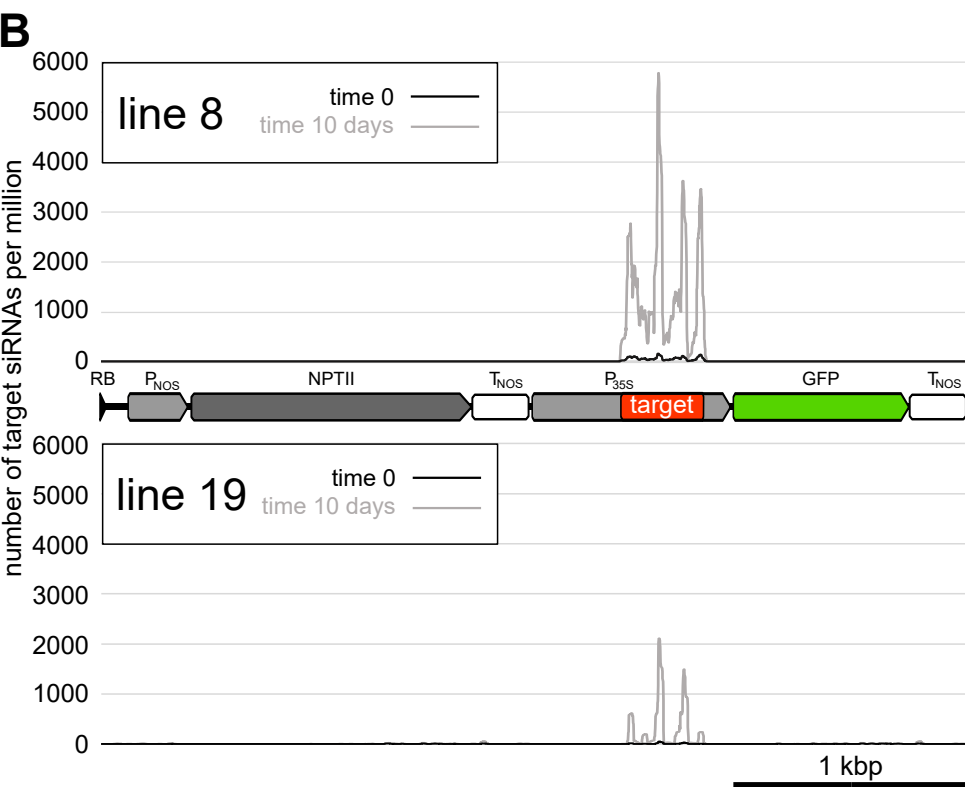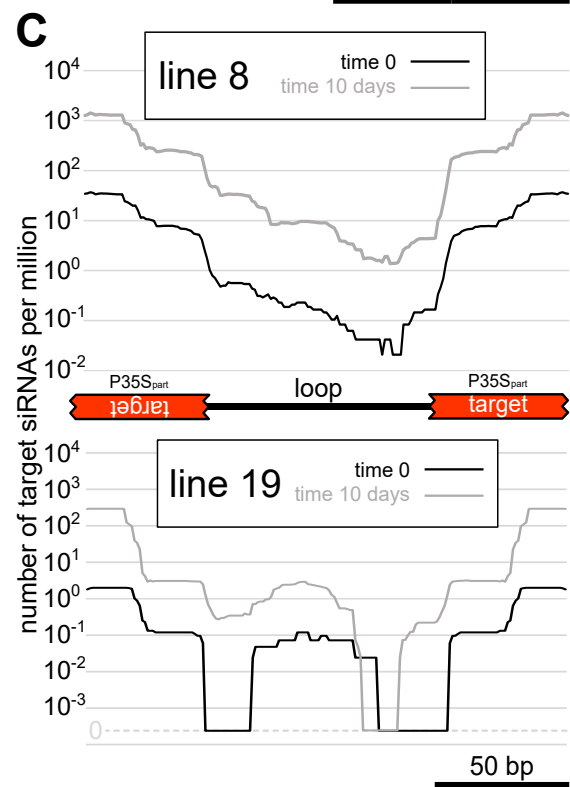

**Additional file 5 Distribution of siRNAs along the two T-DNAs before and after 10-day treatment with  $\beta$ -estradiol.**

siRNAs matching with (A) the inducer (unspliced) and (B) the target T-DNAs are depicted as the numbers per million of all sequenced siRNAs (note different scales for the two lines); (C) close-up of the distribution of siRNAs along the spliced spacer region of the hairpin transcript (in a logarithmic scale).
